# Supplementary material for: Determination of the rotational isomerization rate along carbon–carbon single bonds in solution
Source: Royal Society of Chemistry journal article supplement (doi:10.1039/d4cp04471a), 2025-01-01
Supplement: d4cp04471a1.pdf [file d4cp04471a1.pdf]

## Supplementary Information

### Determination of the Rotational Isomerization Rate along Carbon–Carbon Single Bonds in Solution

*Seongchul Park, Hojeong Yoon, Juhyang Shin, and Manho Lim\**

Department of Chemistry and Chemistry Institute for Functional Materials, Pusan National University, Busan 46241, Korea

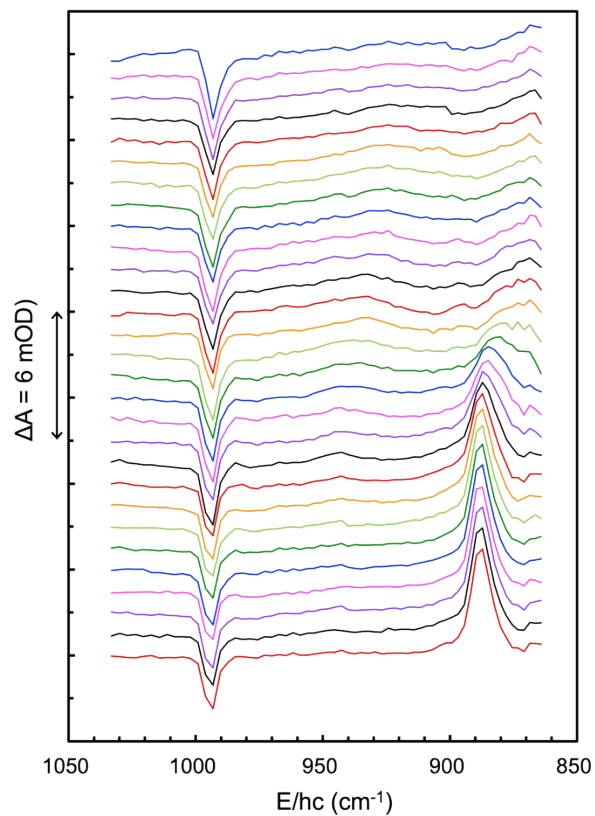

**Figure S1.** Time-resolved infrared (TRIR) spectra of  $\text{CF}_2\text{BrCF}_2\text{I}$  in  $\text{CCl}_4$  at 280 K collected over a pump-probe delay range of 0.32–1000 ps following excitation at 267 nm, in the spectral region of 1050–850  $\text{cm}^{-1}$ . The pump-probe delay times, from the top of the spectra, are as follows: 0.32, 0.42, 0.56, 0.75, 1.0, 1.3, 1.8, 2.4, 3.2, 4.2, 5.6, 7.5, 10, 13, 18, 24, 32, 42, 56, 75, 100, 130, 180, 240, 320, 420, 560, 750, 1000 ps.

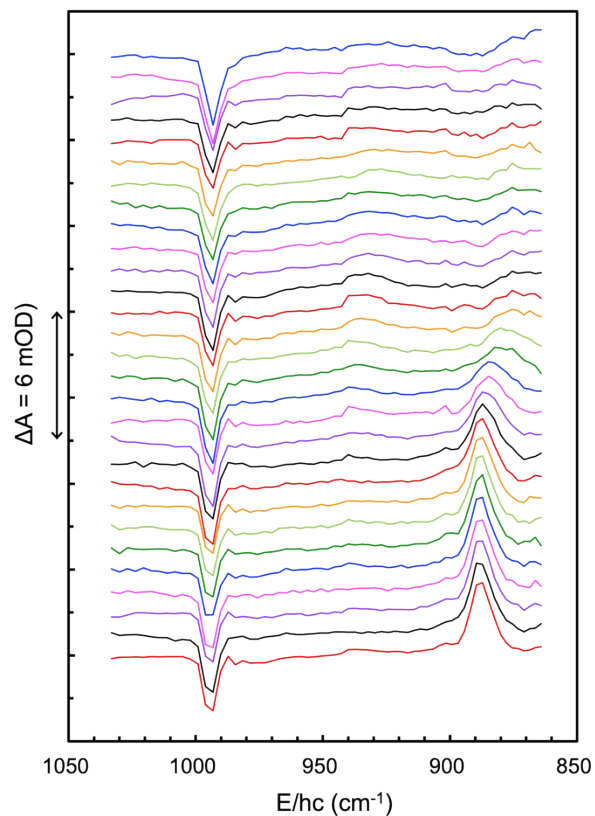

**Figure S2.** TRIR spectra of CF<sub>2</sub>BrCF<sub>2</sub>I in CCl<sub>4</sub> at 300 K collected over a pump-probe delay range of 0.32–1000 ps following excitation at 267 nm, in the spectral region of 1050–850 cm<sup>-1</sup>. The pump-probe delay times, from the top of the spectra, are as follows: 0.32, 0.42, 0.56, 0.75, 1.0, 1.3, 1.8, 2.4, 3.2, 4.2, 5.6, 7.5, 10, 13, 18, 24, 32, 42, 56, 75, 100, 130, 180, 240, 320, 420, 560, 750, 1000 ps.

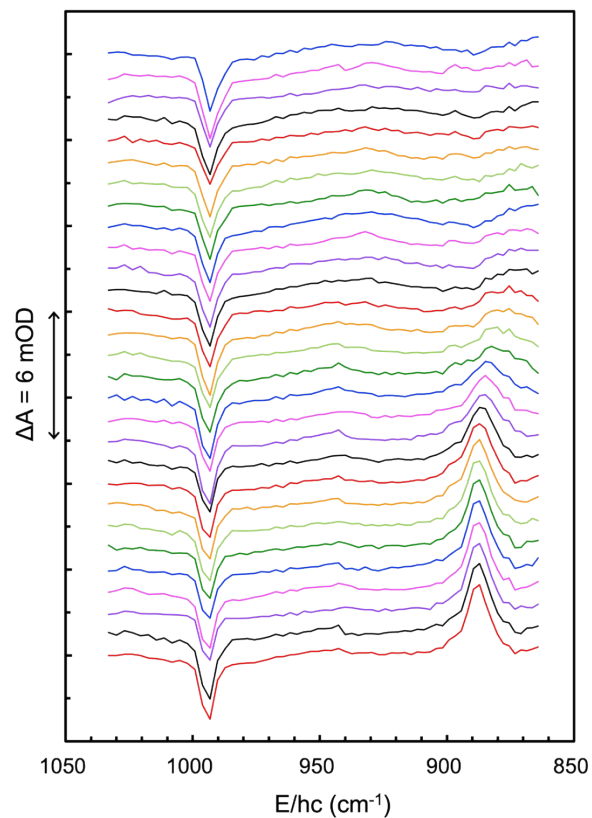

**Figure S3.** TRIR spectra of  $\text{CF}_2\text{BrCF}_2\text{I}$  in  $\text{CCl}_4$  at 310 K collected over a pump-probe delay range of 0.32–1000 ps following excitation at 267 nm, in the spectral region of 1050–850  $\text{cm}^{-1}$ . The pump-probe delay times, from the top of the spectra, are as follows: 0.32, 0.42, 0.56, 0.75, 1.0, 1.3, 1.8, 2.4, 3.2, 4.2, 5.6, 7.5, 10, 13, 18, 24, 32, 42, 56, 75, 100, 130, 180, 240, 320, 420, 560, 750, 1000 ps.

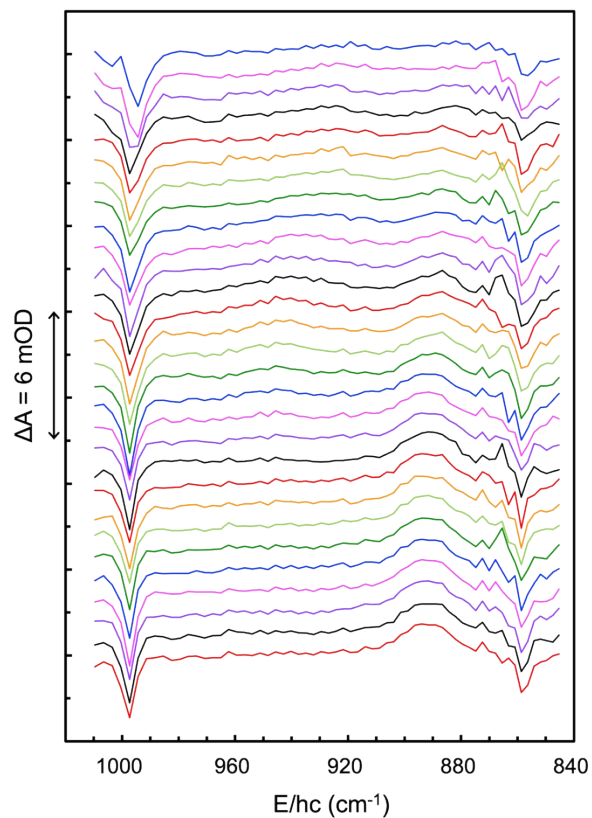

**Figure S4.** TRIR spectra of  $\text{CF}_2\text{BrCF}_2\text{I}$  in DMF at 293 K collected over a pump-probe delay range of 0.32–1000 ps following excitation at 267 nm, in the spectral region of 1050–850  $\text{cm}^{-1}$ . The pump-probe delay times, from the top of the spectra, are as follows: 0.32, 0.42, 0.56, 0.75, 1.0, 1.3, 1.8, 2.4, 3.2, 4.2, 5.6, 7.5, 10, 13, 18, 24, 32, 42, 56, 75, 100, 130, 180, 240, 320, 420, 560, 750, 1000 ps.

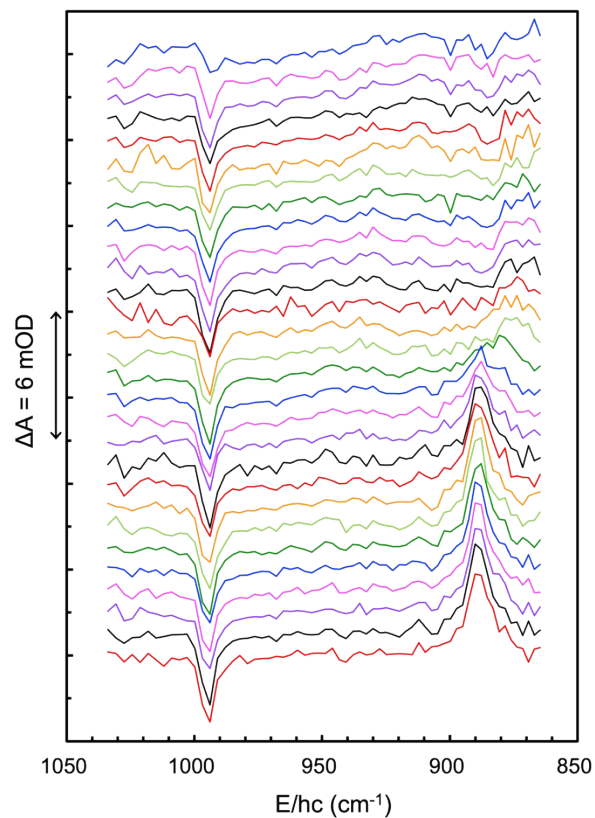

**Figure S5.** TRIR spectra of  $\text{CF}_2\text{BrCF}_2\text{I}$  in *n*-hexane at 293 K collected over a pump-probe delay range of 0.32–1000 ps following excitation at 267 nm, in the spectral region of 1050–850  $\text{cm}^{-1}$ . The pump-probe delay times, from the top of the spectra, are as follows: 0.32, 0.42, 0.56, 0.75, 1.0, 1.3, 1.8, 2.4, 3.2, 4.2, 5.6, 7.5, 10, 13, 18, 24, 32, 42, 56, 75, 100, 130, 180, 240, 320, 420, 560, 750, 1000 ps.

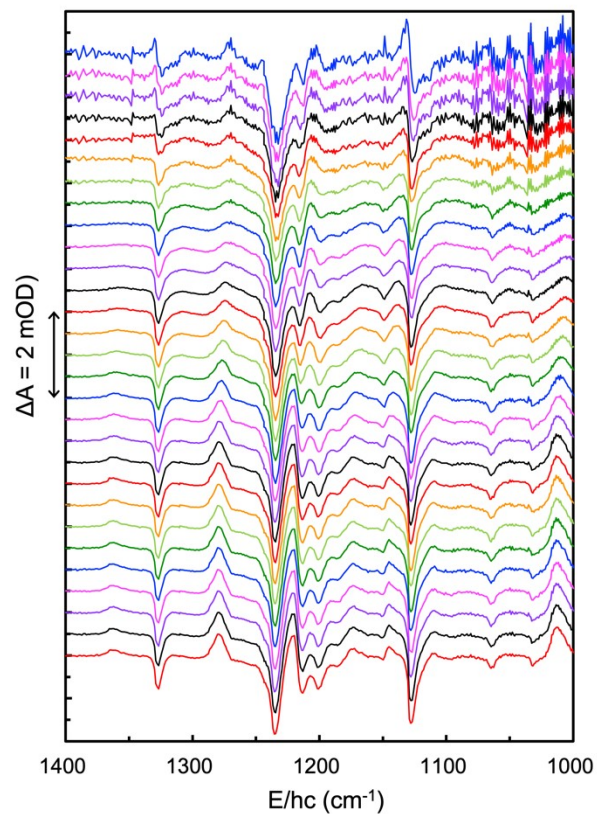

**Figure S6.** TRIR spectra of CF<sub>3</sub>CF<sub>2</sub>CF<sub>2</sub>I in CCl<sub>4</sub> at 293 K collected over a pump-probe delay range of 0.32–1000 ps following excitation at 267 nm, in the spectral region of 1400–1000 cm<sup>-1</sup>. The pump-probe delay times, from the top of the spectra, are as follows: 0.32, 0.42, 0.56, 0.75, 1.0, 1.3, 1.8, 2.4, 3.2, 4.2, 5.6, 7.5, 10, 13, 18, 24, 32, 42, 56, 75, 100, 130, 180, 240, 320, 420, 560, 750, 1000 ps.

**Table S1.** Coordinates of *anti*-CF<sub>2</sub>BrCF<sub>2</sub>• and *gauche*-CF<sub>2</sub>BrCF<sub>2</sub>• in CCl<sub>4</sub> calculated by DFT using  $\omega$ B97XD/aug-cc-pVTZ at 298 K.

| <i>anti</i> -CF <sub>2</sub> BrCF <sub>2</sub> • |           |           |           | <i>gauche</i> -CF <sub>2</sub> BrCF <sub>2</sub> • |           |           |           |
|--------------------------------------------------|-----------|-----------|-----------|----------------------------------------------------|-----------|-----------|-----------|
| Coordinates (Angstroms)                          |           |           |           | Coordinates (Angstroms)                            |           |           |           |
|                                                  | X         | Y         | Z         |                                                    | X         | Y         | Z         |
| C                                                | -1.532099 | -0.140761 | 0.000016  | C                                                  | -1.333363 | -0.470176 | -0.360446 |
| C                                                | -0.279117 | 0.695933  | 0.000007  | C                                                  | -0.27999  | 0.51847   | 0.100203  |
| F                                                | -1.742525 | -0.840001 | 1.087546  | F                                                  | -2.549472 | 0.030811  | -0.41002  |
| F                                                | -1.742551 | -0.839988 | -1.087516 | F                                                  | -1.315464 | -1.634884 | 0.244965  |
| F                                                | -0.259948 | 1.46765   | 1.084127  | F                                                  | -0.46451  | 0.85952   | 1.38743   |
| F                                                | -0.259972 | 1.467663  | -1.084104 | F                                                  | -0.386807 | 1.628307  | -0.629916 |
| Br                                               | 1.34035   | -0.41797  | -0.000018 | Br                                                 | 1.489325  | -0.23553  | -0.107734 |

**Table S2.** Coordinates of *anti*-CF<sub>2</sub>BrCF<sub>2</sub>• and *gauche*-CF<sub>2</sub>BrCF<sub>2</sub>• in CCl<sub>4</sub> calculated by DFT using APFD/aug-cc-pVTZ at 298 K.

| <i>anti</i> -CF <sub>2</sub> BrCF <sub>2</sub> • |           |           |           | <i>gauche</i> -CF <sub>2</sub> BrCF <sub>2</sub> • |           |           |           |
|--------------------------------------------------|-----------|-----------|-----------|----------------------------------------------------|-----------|-----------|-----------|
| Coordinates (Angstroms)                          |           |           |           | Coordinates (Angstroms)                            |           |           |           |
|                                                  | X         | Y         | Z         |                                                    | X         | Y         | Z         |
| C                                                | 0.283045  | 0.523968  | 0.096664  | C                                                  | -1.530535 | -0.145586 | 0.000016  |
| C                                                | 1.333728  | -0.473103 | -0.358778 | C                                                  | -0.284029 | 0.702068  | 0.000008  |
| F                                                | 0.466295  | 0.871259  | 1.384741  | F                                                  | -1.735644 | -0.844263 | 1.090635  |
| F                                                | 0.388592  | 1.630813  | -0.641213 | F                                                  | -1.735661 | -0.844259 | -1.090601 |
| F                                                | 1.297182  | -1.641699 | 0.241405  | F                                                  | -0.261182 | 1.472335  | 1.087337  |
| F                                                | 2.555431  | 0.020033  | -0.399247 | F                                                  | -0.261209 | 1.472353  | -1.087309 |
| Br                                               | -1.487661 | -0.23511  | -0.105671 | Br                                                 | 1.338019  | -0.418411 | -0.00002  |

**Table S3.** Coordinates of *anti*-CF<sub>2</sub>BrCF<sub>2</sub>• and *gauche*-CF<sub>2</sub>BrCF<sub>2</sub>• in CCl<sub>4</sub> calculated by DFT using B3LYP/aug-cc-pVTZ at 298 K.

| <i>anti</i> -CF <sub>2</sub> BrCF <sub>2</sub> • |           |           |           | <i>gauche</i> -CF <sub>2</sub> BrCF <sub>2</sub> • |           |           |           |
|--------------------------------------------------|-----------|-----------|-----------|----------------------------------------------------|-----------|-----------|-----------|
| Coordinates (Angstroms)                          |           |           |           | Coordinates (Angstroms)                            |           |           |           |
|                                                  | X         | Y         | Z         |                                                    | X         | Y         | Z         |
| C                                                | -1.536222 | -0.151556 | 0.000016  | C                                                  | -1.336455 | -0.473164 | -0.359803 |
| C                                                | -0.297361 | 0.697085  | 0.000011  | C                                                  | -0.288739 | 0.518231  | 0.101179  |
| F                                                | -1.751788 | -0.852689 | 1.093675  | F                                                  | -2.562317 | 0.02581   | -0.418634 |
| F                                                | -1.75178  | -0.852712 | -1.093629 | F                                                  | -1.319172 | -1.64479  | 0.248835  |
| F                                                | -0.279356 | 1.473408  | 1.090986  | F                                                  | -0.472593 | 0.862163  | 1.397802  |
| F                                                | -0.279388 | 1.473439  | -1.090941 | F                                                  | -0.399242 | 1.636096  | -0.631216 |
| Br                                               | 1.358923  | -0.412749 | -0.000028 | Br                                                 | 1.500888  | -0.233826 | -0.109124 |



**Table S4.** Coordinates of *anti*-CF<sub>3</sub>CF<sub>2</sub>CF<sub>2</sub>• and *gauche*-CF<sub>3</sub>CF<sub>2</sub>CF<sub>2</sub>• in CCl<sub>4</sub> calculated by DFT using ωB97XD/aug-cc-pVTZ at 298 K.

| <i>anti</i> -CF <sub>3</sub> CF <sub>2</sub> CF <sub>2</sub> • |           |           |           | <i>gauche</i> -CF <sub>3</sub> CF <sub>2</sub> CF <sub>2</sub> • |           |           |           |
|----------------------------------------------------------------|-----------|-----------|-----------|------------------------------------------------------------------|-----------|-----------|-----------|
| Coordinates (Angstroms)                                        |           |           |           | Coordinates (Angstroms)                                          |           |           |           |
|                                                                | X         | Y         | Z         |                                                                  | X         | Y         | Z         |
| C                                                              | -0.117554 | 0.672297  | -0.000085 | C                                                                | 0.192188  | -0.493104 | 0.130236  |
| C                                                              | -1.528444 | 0.10867   | -0.000029 | C                                                                | 1.371961  | 0.330759  | -0.351712 |
| C                                                              | 1.033468  | -0.38043  | 0.000056  | C                                                                | -1.178997 | 0.200245  | -0.104806 |
| F                                                              | -1.882474 | -0.533185 | 1.08897   | F                                                                | 2.512157  | -0.320025 | -0.36077  |
| F                                                              | -1.882443 | -0.533475 | -1.088867 | F                                                                | 1.49044   | 1.520403  | 0.193105  |
| F                                                              | 0.031365  | 1.433511  | 1.094822  | F                                                                | 0.297383  | -0.765339 | 1.450168  |
| F                                                              | 0.031387  | 1.433241  | -1.095176 | F                                                                | 0.19304   | -1.655588 | -0.536614 |
| F                                                              | 2.210419  | 0.231281  | -0.000021 | F                                                                | -2.157279 | -0.627858 | 0.234612  |
| F                                                              | 0.950047  | -1.149059 | 1.080287  | F                                                                | -1.281071 | 1.30381   | 0.625008  |
| F                                                              | 0.950051  | -1.149339 | -1.079976 | F                                                                | -1.311438 | 0.51933   | -1.387989 |

**Table S5.** Coordinates of *anti*-CF<sub>2</sub>BrCF<sub>2</sub>I and *gauche*-CF<sub>2</sub>BrCF<sub>2</sub>I in CCl<sub>4</sub> calculated by DFT using ωB97XD/aug-cc-pVTZ at 298 K.

| <i>anti</i> -CF <sub>2</sub> BrCF <sub>2</sub> I |           |           |           | <i>gauche</i> -CF <sub>2</sub> BrCF <sub>2</sub> I |           |           |           |
|--------------------------------------------------|-----------|-----------|-----------|----------------------------------------------------|-----------|-----------|-----------|
| Coordinates (Angstroms)                          |           |           |           | Coordinates (Angstroms)                            |           |           |           |
|                                                  | X         | Y         | Z         |                                                    | X         | Y         | Z         |
| C                                                | 0.897288  | -0.564835 | 0.000073  | C                                                  | 1.132962  | 0.65986   | 0.382842  |
| C                                                | -0.113579 | 0.618228  | 0.000076  | C                                                  | -0.206175 | 0.954422  | -0.366392 |
| F                                                | 0.703428  | -1.316129 | -1.081132 | F                                                  | 0.911288  | 0.650724  | 1.695058  |
| F                                                | 0.703561  | -1.316042 | 1.081363  | F                                                  | 1.976173  | 1.658916  | 0.113631  |
| F                                                | 0.092645  | 1.369412  | -1.082419 | F                                                  | 0.02934   | 0.972334  | -1.679184 |
| F                                                | 0.092536  | 1.369333  | 1.082648  | F                                                  | -0.596314 | 2.182001  | -0.00258  |
| I                                                | -2.157817 | -0.082445 | -0.000052 | I                                                  | -1.781358 | -0.443974 | 0.081787  |
| Br                                               | 2.723787  | 0.088288  | -0.000065 | Br                                                 | 1.94191   | -1.009453 | -0.159307 |

**Table S6.** Coordinates of *anti*-CH<sub>3</sub>CH<sub>2</sub>CH<sub>2</sub>CH<sub>3</sub> and *gauche*-CH<sub>3</sub>CH<sub>2</sub>CH<sub>2</sub>CH<sub>3</sub> in CCl<sub>4</sub> calculated by DFT using ωB97XD/aug-cc-pVTZ at 298 K.

| <i>anti</i> -CH <sub>3</sub> CH <sub>2</sub> CH <sub>2</sub> CH <sub>3</sub> |           |           |           | <i>gauche</i> -CH <sub>3</sub> CH <sub>2</sub> CH <sub>2</sub> CH <sub>3</sub> |           |           |           |
|------------------------------------------------------------------------------|-----------|-----------|-----------|--------------------------------------------------------------------------------|-----------|-----------|-----------|
| Coordinates (Angstroms)                                                      |           |           |           | Coordinates (Angstroms)                                                        |           |           |           |
|                                                                              | X         | Y         | Z         |                                                                                | X         | Y         | Z         |
| C                                                                            | -1.948541 | 0.120163  | 0.000187  | C                                                                              | 1.559838  | -0.56025  | 0.123041  |
| H                                                                            | -2.090371 | 0.749404  | -0.880579 | H                                                                              | 2.570346  | -0.474768 | -0.276949 |
| H                                                                            | -2.090312 | 0.748294  | 0.881753  | H                                                                              | 1.14502   | -1.503655 | -0.232888 |
| H                                                                            | -2.733652 | -0.636297 | -0.000243 | H                                                                              | 1.634594  | -0.619426 | 1.210927  |
| C                                                                            | -0.563335 | -0.513119 | -0.000219 | C                                                                              | 0.702167  | 0.626882  | -0.301006 |
| H                                                                            | -0.456857 | -1.161873 | 0.874008  | H                                                                              | 1.206809  | 1.552583  | -0.015567 |
| H                                                                            | -0.457153 | -1.161492 | -0.87476  | H                                                                              | 0.621828  | 0.645476  | -1.391832 |
| C                                                                            | 0.563335  | 0.513119  | -0.000215 | C                                                                              | -0.702167 | 0.626882  | 0.301006  |
| H                                                                            | 0.45685   | 1.161875  | 0.874008  | H                                                                              | -0.621828 | 0.645476  | 1.391832  |
| H                                                                            | 0.457159  | 1.16149   | -0.87476  | H                                                                              | -1.206809 | 1.552583  | 0.015567  |
| C                                                                            | 1.948541  | -0.120163 | 0.00019   | C                                                                              | -1.559838 | -0.56025  | -0.123041 |
| H                                                                            | 2.090399  | -0.749324 | -0.880629 | H                                                                              | -1.14502  | -1.503655 | 0.232888  |
| H                                                                            | 2.733652  | 0.636298  | -0.000158 | H                                                                              | -2.570346 | -0.474768 | 0.276949  |
| H                                                                            | 2.090284  | -0.748373 | 0.881703  | H                                                                              | -1.634594 | -0.619426 | -1.210927 |
| C                                                                            | -1.948541 | 0.120163  | 0.000187  | C                                                                              | 1.559838  | -0.56025  | 0.123041  |

**Table S7.** Coordinates of *anti*-CH<sub>3</sub>CH<sub>2</sub>CH•CH<sub>3</sub> and *gauche*-CH<sub>3</sub>CH<sub>2</sub>CH•CH<sub>3</sub> in CCl<sub>4</sub> calculated by DFT using  $\omega$ B97XD/aug-cc-pVTZ at 298 K.

|   | <i>anti</i> -CH <sub>3</sub> CH <sub>2</sub> CH•CH <sub>3</sub> |           |           | <i>gauche</i> -CH <sub>3</sub> CH <sub>2</sub> CH•CH <sub>3</sub> |           |           |           |
|---|-----------------------------------------------------------------|-----------|-----------|-------------------------------------------------------------------|-----------|-----------|-----------|
|   | Coordinates (Angstroms)                                         |           |           | Coordinates (Angstroms)                                           |           |           |           |
|   | X                                                               | Y         | Z         | X                                                                 | Y         | Z         |           |
| C | 1.929559                                                        | 0.164897  | -0.04802  | C                                                                 | 1.588182  | 0.541362  | -0.144243 |
| H | 2.734412                                                        | -0.568418 | -0.001735 | H                                                                 | 2.560158  | 0.492815  | 0.348082  |
| H | 2.075843                                                        | 0.875179  | 0.767209  | H                                                                 | 1.141432  | 1.509067  | 0.086373  |
| H | 2.024239                                                        | 0.711758  | -0.986905 | H                                                                 | 1.749436  | 0.494371  | -1.221746 |
| C | 0.563995                                                        | -0.504211 | 0.055467  | C                                                                 | 0.679183  | -0.608234 | 0.323471  |
| H | 0.449333                                                        | -1.242615 | -0.747529 | H                                                                 | 1.173868  | -1.557622 | 0.110368  |
| H | 0.520254                                                        | -1.09439  | 0.983719  | H                                                                 | 0.574951  | -0.541823 | 1.411709  |
| C | -0.576604                                                       | 0.44779   | 0.016274  | C                                                                 | -0.668657 | -0.582226 | -0.307074 |
| H | -0.388496                                                       | 1.494593  | 0.221684  | H                                                                 | -0.82408  | -1.134845 | -1.225399 |
| C | -1.976053                                                       | -0.043584 | -0.039029 | C                                                                 | -1.684455 | 0.421175  | 0.102424  |
| H | -2.273751                                                       | -0.525647 | 0.902855  | H                                                                 | -1.463199 | 1.418494  | -0.303415 |
| H | -2.685391                                                       | 0.761046  | -0.228269 | H                                                                 | -2.68299  | 0.15452   | -0.243412 |
| H | -2.101824                                                       | -0.80086  | -0.819183 | H                                                                 | -1.715096 | 0.532567  | 1.189969  |
| C | 1.929559                                                        | 0.164897  | -0.04802  | C                                                                 | 1.588182  | 0.541362  | -0.144243 |
| H | 2.734412                                                        | -0.568418 | -0.001735 | H                                                                 | 2.560158  | 0.492815  | 0.348082  |

**Table S8.** Coordinates of CH<sub>3</sub>CH<sub>3</sub> and CH<sub>3</sub>CH<sub>2</sub>• in CCl<sub>4</sub> calculated by DFT using  $\omega$ B97XD/aug-cc-pVTZ at 298 K.

|   | CH <sub>3</sub> CH <sub>3</sub> |           |           | CH <sub>3</sub> CH <sub>2</sub> • |           |           |           |
|---|---------------------------------|-----------|-----------|-----------------------------------|-----------|-----------|-----------|
|   | Coordinates (Angstroms)         |           |           | Coordinates (Angstroms)           |           |           |           |
|   | X                               | Y         | Z         | X                                 | Y         | Z         |           |
| C | 0.000000                        | 0.000000  | 0.761362  | C                                 | -0.690977 | 0.000003  | -0.002054 |
| H | 0.508176                        | 0.880189  | 1.15612   | H                                 | -1.101227 | -0.884676 | -0.491072 |
| H | 0.508178                        | -0.880188 | 1.15612   | H                                 | -1.101224 | 0.884843  | -0.490777 |
| H | -1.016354                       | -0.000001 | 1.15612   | H                                 | -1.085203 | -0.000176 | 1.023514  |
| C | 0.000000                        | 0.000000  | -0.761362 | C                                 | 0.79047   | 0.000000  | -0.018155 |
| H | -0.508178                       | -0.880188 | -1.15612  | H                                 | 1.345355  | 0.925306  | 0.039796  |
| H | -0.508176                       | 0.880189  | -1.15612  | H                                 | 1.345341  | -0.925315 | 0.039794  |
| H | 1.016354                        | -0.000001 | -1.15612  | C                                 | -0.690977 | 0.000003  | -0.002054 |

**Table S9.** Coordinates of *anti*-CF<sub>2</sub>ICF<sub>2</sub>• and *gauche*-CF<sub>2</sub>ICF<sub>2</sub>• in CCl<sub>4</sub> calculated by DFT using  $\omega$ B97XD/aug-cc-pVTZ at 298 K.

|   | <i>anti</i> -CF <sub>2</sub> ICF <sub>2</sub> • |           |           | <i>gauche</i> -CF <sub>2</sub> ICF <sub>2</sub> • |           |           |           |
|---|-------------------------------------------------|-----------|-----------|---------------------------------------------------|-----------|-----------|-----------|
|   | Coordinates (Angstroms)                         |           |           | Coordinates (Angstroms)                           |           |           |           |
|   | X                                               | Y         | Z         | X                                                 | Y         | Z         |           |
| C | -1.844433                                       | -0.304541 | 0.000024  | C                                                 | -1.663204 | -0.521522 | -0.360038 |
| C | -0.746438                                       | 0.718842  | 0.000018  | C                                                 | -0.697706 | 0.546903  | 0.108704  |
| F | -1.950923                                       | -1.027147 | 1.087559  | F                                                 | -2.911473 | -0.113881 | -0.464412 |
| F | -1.950917                                       | -1.027166 | -1.087498 | F                                                 | -1.584323 | -1.67088  | 0.272352  |
| F | -0.852505                                       | 1.486932  | 1.086113  | F                                                 | -0.945769 | 0.891834  | 1.388522  |
| F | -0.852542                                       | 1.486957  | -1.086055 | F                                                 | -0.877542 | 1.638201  | -0.641613 |
| I | 1.245419                                        | -0.203057 | -0.000025 | I                                                 | 1.340329  | -0.12943  | -0.065767 |

**Table S10.** Coordinates of *anti*-CH<sub>2</sub>ClCF<sub>2</sub>Cl and *gauche*-CH<sub>2</sub>ClCF<sub>2</sub>Cl in CCl<sub>4</sub> calculated by DFT using  $\omega$ B97XD/aug-cc-pVTZ at 298 K.

| <i>anti</i> -CH <sub>2</sub> ClCF <sub>2</sub> Cl |           |           |           | <i>gauche</i> -CH <sub>2</sub> ClCF <sub>2</sub> Cl |           |           |           |
|---------------------------------------------------|-----------|-----------|-----------|-----------------------------------------------------|-----------|-----------|-----------|
| Coordinates (Angstroms)                           |           |           |           | Coordinates (Angstroms)                             |           |           |           |
|                                                   | X         | Y         | Z         |                                                     | X         | Y         | Z         |
| C                                                 | 0.622398  | -0.856901 | 0.000001  | C                                                   | -0.591939 | -0.405792 | 0.020483  |
| C                                                 | -0.425096 | 0.238723  | 0.000009  | C                                                   | 0.730802  | -0.656192 | -0.682759 |
| F                                                 | -0.327589 | 1.021937  | -1.077837 | F                                                   | -0.540793 | -0.766503 | 1.306383  |
| F                                                 | -0.327598 | 1.021916  | 1.077871  | F                                                   | -1.523672 | -1.171899 | -0.573105 |
| H                                                 | 0.503695  | -1.464707 | -0.890594 | Cl                                                  | 2.077639  | 0.232716  | 0.053649  |
| H                                                 | 0.503712  | -1.464707 | 0.890598  | Cl                                                  | -1.127106 | 1.290612  | -0.07082  |
| Cl                                                | 2.267833  | -0.174224 | -0.000016 | H                                                   | 0.643569  | -0.359672 | -1.722475 |
| Cl                                                | -2.049864 | -0.517317 | -0.000006 | H                                                   | 0.944384  | -1.719383 | -0.611461 |

**Table S11.** Coordinates of *anti*-CH<sub>2</sub>FCH<sub>2</sub>NCO and *gauche*-CH<sub>2</sub>FCH<sub>2</sub>NCO in CCl<sub>4</sub> calculated by DFT using  $\omega$ B97XD/aug-cc-pVTZ at 298 K.

| <i>anti</i> -CH <sub>2</sub> FCH <sub>2</sub> NCO |           |           |           | <i>gauche</i> -CH <sub>2</sub> FCH <sub>2</sub> NCO |           |           |           |
|---------------------------------------------------|-----------|-----------|-----------|-----------------------------------------------------|-----------|-----------|-----------|
| Coordinates (Angstroms)                           |           |           |           | Coordinates (Angstroms)                             |           |           |           |
|                                                   | X         | Y         | Z         |                                                     | X         | Y         | Z         |
| C                                                 | -1.616306 | 0.505492  | 0.000264  | C                                                   | 1.654537  | -0.038182 | 0.312446  |
| H                                                 | -1.591626 | 1.133699  | 0.890794  | H                                                   | 2.692733  | 0.132313  | 0.025781  |
| H                                                 | -1.592498 | 1.133909  | -0.890143 | H                                                   | 1.570239  | -0.078629 | 1.398441  |
| C                                                 | -0.465748 | -0.483526 | -0.000454 | C                                                   | 0.77586   | 1.046108  | -0.265369 |
| H                                                 | -0.52816  | -1.117605 | 0.884405  | H                                                   | 1.148384  | 2.009273  | 0.080365  |
| H                                                 | -0.529317 | -1.117536 | -0.885283 | H                                                   | 0.840341  | 1.033238  | -1.354313 |
| F                                                 | -2.805566 | -0.204237 | 0.000777  | F                                                   | 1.267869  | -1.273767 | -0.186336 |
| N                                                 | 0.77187   | 0.24988   | -0.001351 | N                                                   | -0.598549 | 0.919232  | 0.144065  |
| C                                                 | 1.94744   | 0.042005  | -0.000134 | C                                                   | -1.471543 | 0.107135  | 0.037689  |
| O                                                 | 3.112037  | -0.040914 | 0.000579  | O                                                   | -2.403224 | -0.59466  | 0.001211  |
